# Supplementary material for: Exendin-4 Promotes Schwann Cell Survival/Migration and Myelination In Vitro
Source: PubMed Central journal article supplement (PMC7999558; doi:10.3390/ijms22062971), 2021-03-15
Supplement: ijms-22-02971-s001.pdf [file ijms-22-02971-s001.pdf]

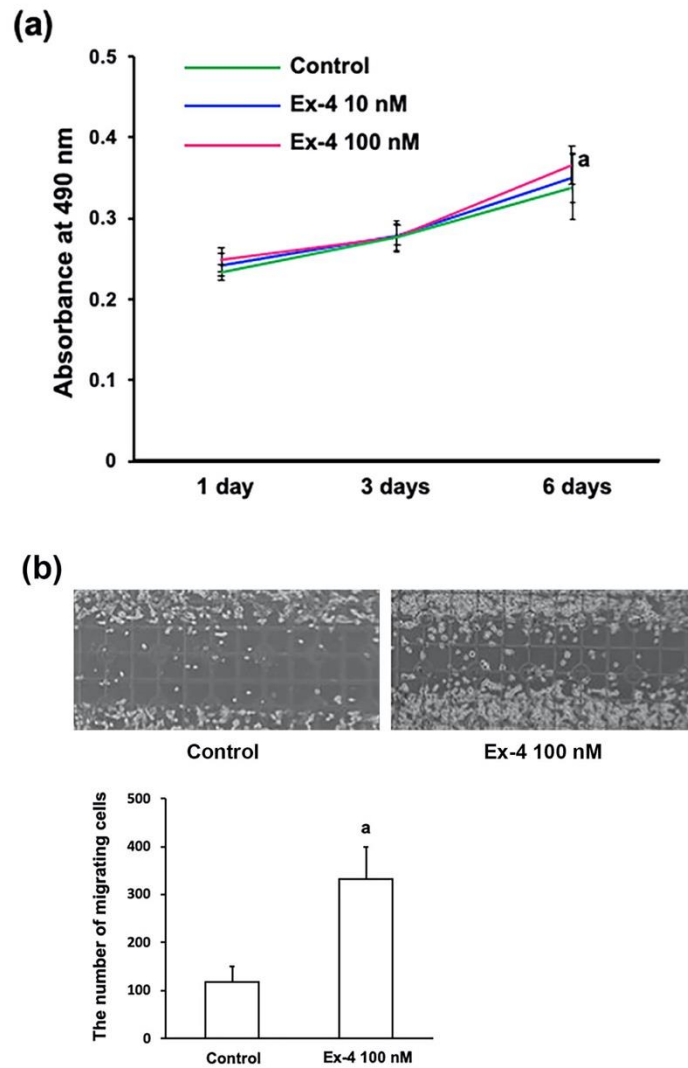

**Supplementary Figure 1.** Ex-4 promotes survival/proliferation and migration of 1970C3 cells. **(a)** MTS assay; the absorbance at 1 day, 3 days, and 6 days after treatment with 0 (Control), 10 nM and 100 nM Ex-4. Values represent means  $\pm$  SD from 12 experiments. a:  $P < 0.05$  as compared with Control. **(b)** Scratch wound assay; representative photomicrographs of 1970C3 cells (**upper**) and the number of migrating cells at 1 day after scratch and treatment with 0 (Control) and 100 nM Ex-4. Values represent means + SD from 9 experiments. a:  $P < 0.01$  as compared with Control.
